# Supplementary material
Source: PubMed Central journal article supplement (PMC3283052)
Supplement: supp_M110.198382_Supplementary.pdf [file supp_M110.198382_Supplementary.pdf]

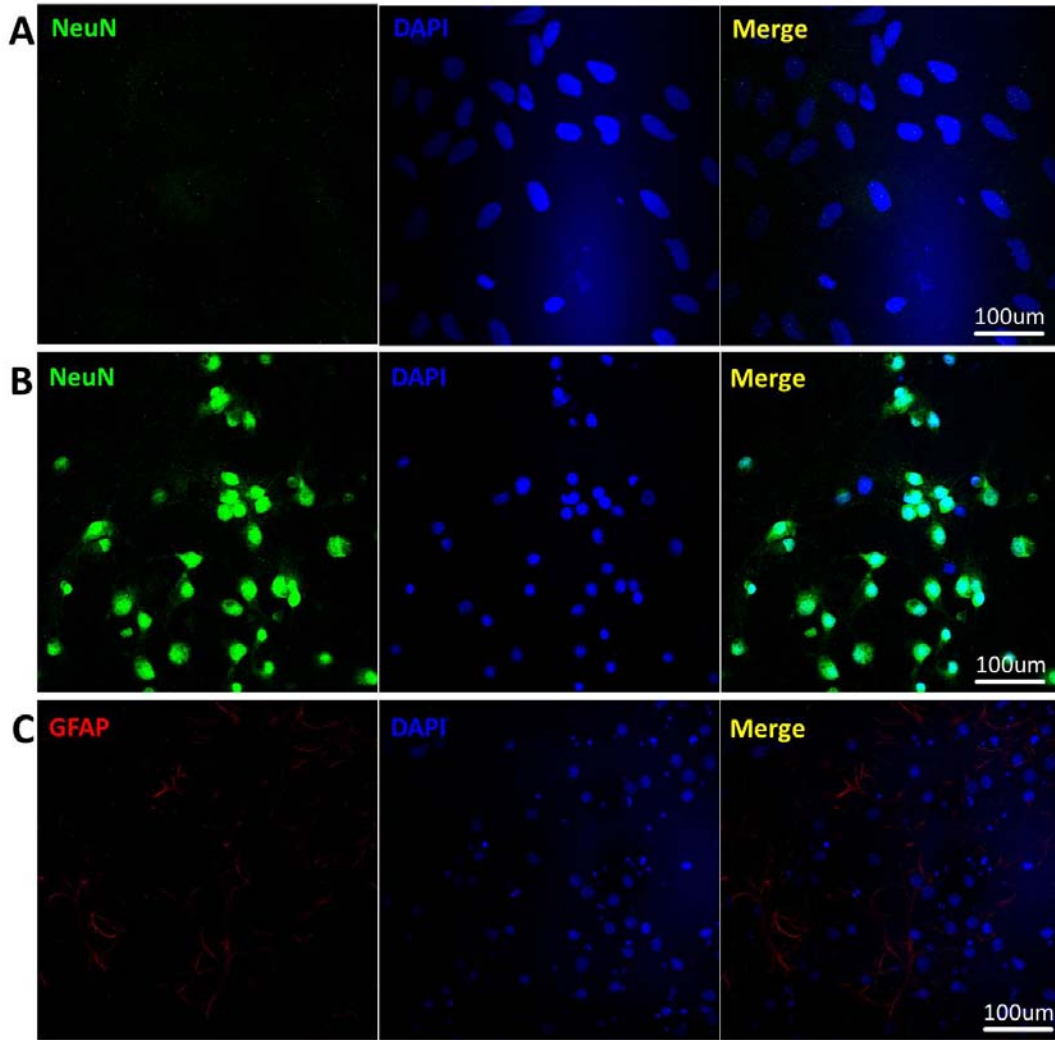

**Supplementary Figure 1.** Negative counter-staining of primary cultured astrocytes and neurons. (A) Primary cultured astrocytes were fixed and stained for NeuN (green) and DAPI (blue). The two channels of each set were merged (merge). (B) Primary cultured neurons were fixed and stained for NeuN (green) and DAPI (blue). The two channels of each set were merged (merge). (C) Primary cultured neurons were fixed and stained for GFAP (red) and DAPI (blue). The two channels of each set were merged (merge).
